# Supplementary material
Source: PubMed Central journal article supplement (PMC6879392)
Supplement: plantbiotechnology-35-2-18.0424a-s001.pdf [file plantbiotechnology-35-2-18.0424a-s001.pdf]

Supplemental Table. Media used for transformation. Media components were autoclaved at 120°C for 20 min. Antibiotics were added after autoclaving.

| Medium                  | Composition                                                                                                                                                                                                                                                                                                          |
|-------------------------|----------------------------------------------------------------------------------------------------------------------------------------------------------------------------------------------------------------------------------------------------------------------------------------------------------------------|
| Callus induction medium | 4.3 g/l Murashige & Skoog (MS) salts (Sigma-Aldrich, St. Louis, MO, USA), 0.25 g/l myo-inositol, 1.0 g/l casamino acids, 1.0 mg/l thiamine HCl, 1.0 mg/l 2,4-D, 30 g/l maltose, 0.69 g/l L-proline, 1.22 mg/l cupric sulfate, 1 g/l polyvinylpyrrolidone, 0.5 mg/l BAP, 25 mg/l meropenem, 3.5 g/l gellan gum, pH5.8 |
| Selection medium        | Callus induction medium with 15 mg/l hygromycin                                                                                                                                                                                                                                                                      |
| Regeneration medium     | 4.3 g/l MS salts, 1 ml/l MS vitamins (Sigma-Aldrich), 0.5 mg/l zeatin, 700 mg/l L-proline, 60 g/l sucrose, 1 mg/l indole-3-acetic acid, 0.1 µM abscisic acid, 0.1 mg/l thidiazuron, 25 mg/l meropenem, 5 mg/l hygromycin, 8 g/l agar, pH 5.6                                                                         |
| Rooting medium          | 2.15 g/l MS salts, 500 µl/l MS vitamins, 20 g/l sucrose, 25 mg/l meropenem, 10 mg/l hygromycin, 3 g/l gellan gum, pH 5.6                                                                                                                                                                                             |
